# Supplementary material for: School Burnout after COVID-19, Prevalence and Role of Different Risk and Protective Factors in Preteen Students
Source: MDPI journal article supplement (doi:10.3390/children10050823), 2023-04-30
Supplement: s1 [file s1]

Table S1: Results of correlations between burnout and risk factors

|                                        | BO      | EE         | CYN     | INAD    |
|----------------------------------------|---------|------------|---------|---------|
| <b>Individual factors</b>              |         |            |         |         |
| <b>Somatic symptoms</b>                |         |            |         |         |
| Lack of energy                         | .541**  | .494**     | .521**  | .425**  |
| Pain (stomach, head, back)             | .493**  | .446**     | .432**  | .446**  |
| Fatigue                                | .587**  | .554**     | .548**  | .455**  |
| Difficulty sleeping                    | .454**  | .455**     | .402**  | .342**  |
| Fear, anxiety                          | .580**  | .587**     | .459**  | .500**  |
| <b>School results</b>                  |         |            |         |         |
| Mathematics average                    | -.460** | -.437**    | -.327** | -.486** |
| French average                         | -.273** | -.266**    | -.197** | -.273** |
| <b>Perceived stress</b>                |         |            |         |         |
| Total perceived stress                 | .712**  | .684**     | .605**  | .614**  |
| Stress related to success              | .683**  | .657**     | .540**  | .639**  |
| Stress related to relationships        | .527**  | .529**     | .439**  | .431**  |
| Stress related to workload             | .628**  | .578**     | .562**  | .538**  |
| <b>Interpersonal factors</b>           |         |            |         |         |
| Support from teachers                  | -.460** | -.414**    | -.444** | -.366** |
| Support from parents                   | -.439** | -.364**    | -.440** | -.370** |
| Support from friends                   | -.413** | -.359**    | -.368** | -.385** |
| Support from peers                     | -.522** | -.498**    | -.478** | -.411** |
| <b>Covid-19 related factors</b>        |         |            |         |         |
| Increased workload after COVID-19      | .402**  | .373**     | .352**  | .349**  |
| Getting back to life before COVID-19   | -.495** | -.435**    | -.437** | -.460** |
| Adequacy of current support            | -.344** | -.271**    | -.334** | -.324** |
| Adequacy of support during containment | -.180*  | -.127 (ns) | -.180*  | -.182*  |
| Trust in future                        | -.551** | -.501**    | -.469** | -.512** |

Note. Correlation is significant at the \*\* $p < 0.01$ ; BO = Burnout ; EE = Exhaustion; CYN = Cynicism ; INAD = Inadequacy

Table S2 : Results of ANOVA between burnout and organizational factors

|                                           | BO       |           | EE       |           | CYN      |           | INAD     |           |
|-------------------------------------------|----------|-----------|----------|-----------|----------|-----------|----------|-----------|
|                                           | <i>M</i> | <i>SD</i> | <i>M</i> | <i>SD</i> | <i>M</i> | <i>SD</i> | <i>M</i> | <i>SD</i> |
| Nombre d'enseignants                      |          |           |          |           |          |           |          |           |
| 1 enseignant ( <i>n</i> = 7)              | 2.44     | .85       | 2.29     | 1.11      | 2.43     | .74       | 2.79     | 1.58      |
| 2 enseignants ( <i>n</i> = 77)            | 2.19     | 1.06      | 1.95     | .92       | 2.33     | 1.24      | 2.45     | 1.46      |
| 3 enseignants ( <i>n</i> = 48)            | 2.38     | 1.01      | 2.14     | 1.03      | 2.42     | 1.22      | 2.82     | 1.39      |
| 4 enseignants ou plus<br>( <i>n</i> = 52) | 2.47     | 1.09      | 2.28     | 1.05      | 2.47     | 1.30      | 2.85     | 1.41      |
| Nombre d'élèves                           |          |           |          |           |          |           |          |           |
| Moins de 14 ( <i>n</i> = 12)              | 2.13     | 1.02      | 1.88     | .68       | 2.22     | 1.47      | 2.50     | 1.26      |
| Entre 14 et 17 ( <i>n</i> = 31)           | 2.43     | .91       | 2.15     | .82       | 2.61     | 1.10      | 2.74     | 1.52      |
| Entre 18 et 21 ( <i>n</i> = 97)           | 2.42     | 1.03      | 2.19     | 1.03      | 2.45     | 1.21      | 2.85     | 1.38      |
| Entre 22 et 25 ( <i>n</i> = 44)           | 2.11     | 1.17      | 1.97     | 1.10      | 2.17     | 1.30      | 2.30     | 1.47      |
